# Supplementary material
Source: PubMed Central journal article supplement (PMC5115516)
Supplement: ADVS-3-0c-s001.pdf [file ADVS-3-0c-s001.pdf]

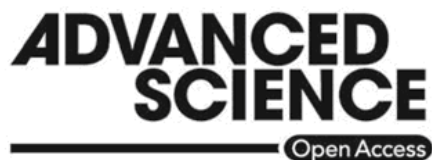

## Supporting Information

for *Adv. Sci.*, DOI: 10.1002/advs.201600182

### All-Copper Nanocluster Based Down-Conversion White Light-Emitting Devices

*Zhenguang Wang, Bingkun Chen, Andrei S. Sussha, Weihua Wang, Claas J. Reckmeier, Rui Chen, Haizheng Zhong, and Andrey L. Rogach\**

## SUPPORTING INFORMATION

### All-copper nanocluster based down-conversion white light-emitting devices

Zhenguang Wang<sup>1</sup>, Bingkun Chen<sup>1,2</sup>, Andrei S. Susha<sup>1</sup>, Weihua Wang<sup>1</sup>, Claas Reckmeier<sup>1</sup>, Rui Chen<sup>1</sup>, Haizheng Zhong<sup>2</sup>, and Andrey L. Rogach<sup>1,\*</sup>

<sup>1</sup> Department of Physics and Materials Science and Centre for Functional Photonics (CFP), City University of Hong Kong, 83 Tat Chee Avenue, Kowloon, Hong Kong SAR.

<sup>2</sup> Beijing Key Laboratory of Nanophotonics and Ultrafine Optoelectronic Systems, School of Materials Science & Engineering, Beijing Institute of Technology, Beijing, 100081, China.

\* Corresponding author. E-mail: andrey.rogach@cityu.edu.hk

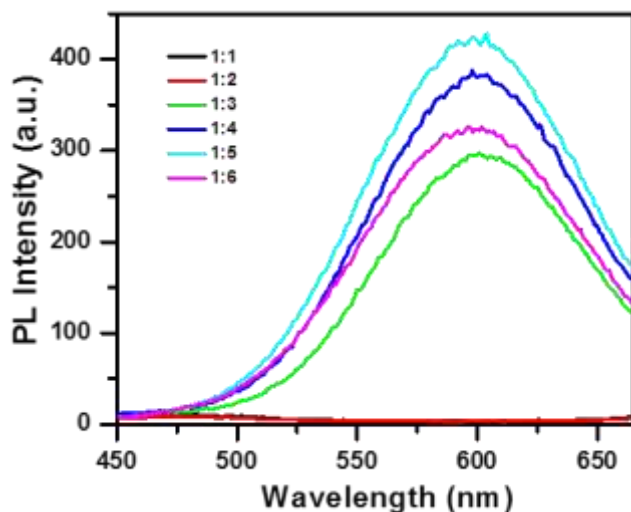

**Figure S1.** PL spectra (excited at 350 nm) of orange Cu NCs synthesized under different ratios of Cu<sup>2+</sup> to GSH as indicated on the frame.

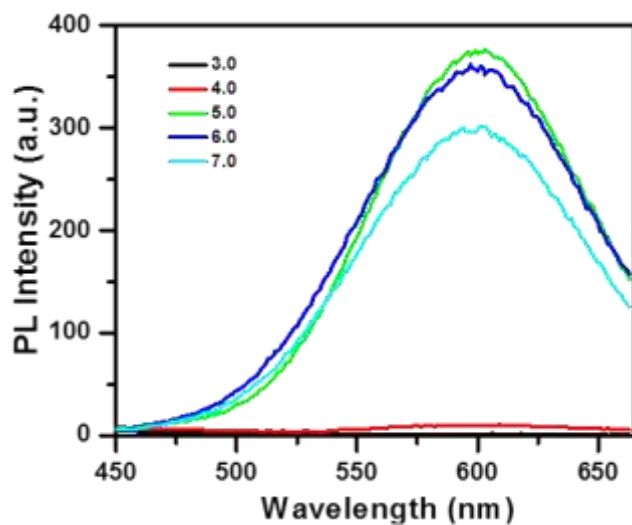

**Figure S2.** PL spectra (excited at 350 nm) of orange Cu NCs synthesized under different pH as indicated on the frame.

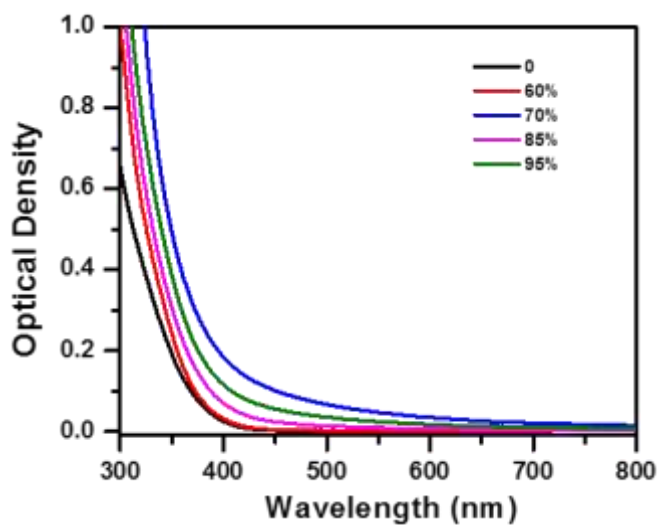

**Figure S3.** Absorption spectra of  $\text{Cu}^{2+}$  / GSH mixtures injected into ethanol for different values of  $f_{\text{ethanol}}$  indicated on the frame.

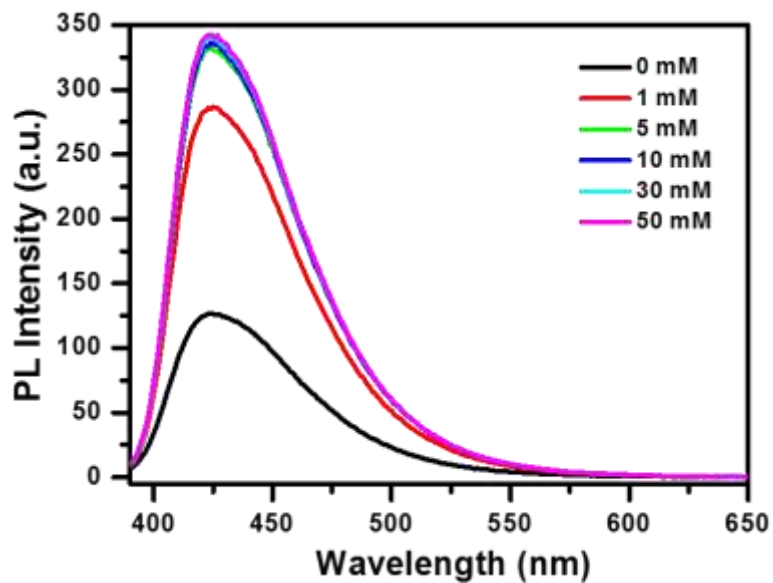

**Figure S4.** PL spectra (excited at 380nm) of blue Cu NCs treated by different amounts of sodium citrate concentration as indicated on the frame.

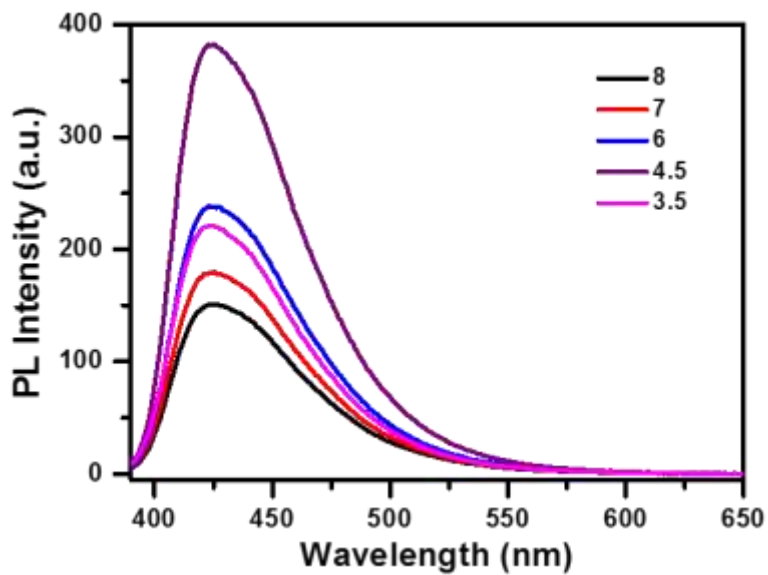

**Figure S5.** PL spectra (excited at 380nm) of blue Cu NCs synthesized under different pH as indicated on the frame.

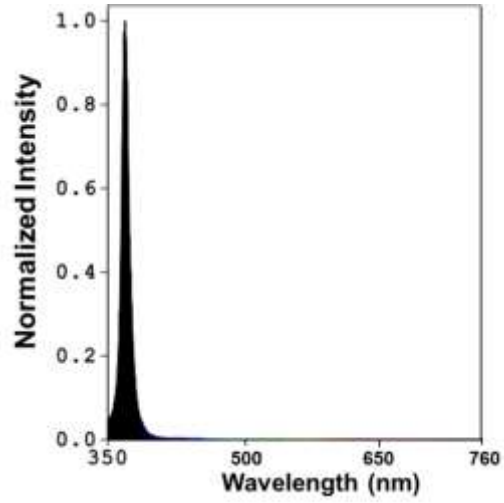

**Figure S6.** Emission spectrum of GaN LED chip used for fabrication of down-conversion LEDs.

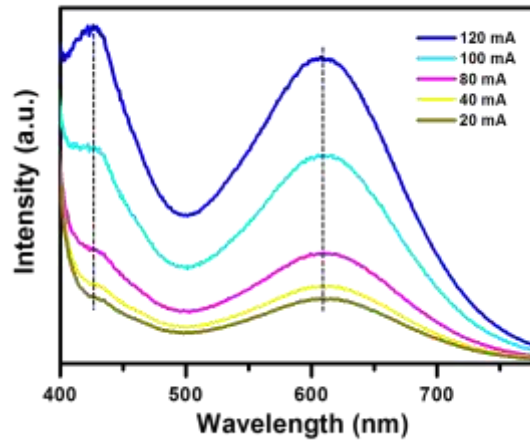

**Figure S7.** Emission spectra of all-copper based down conversion WLEDs operating under different working currents.

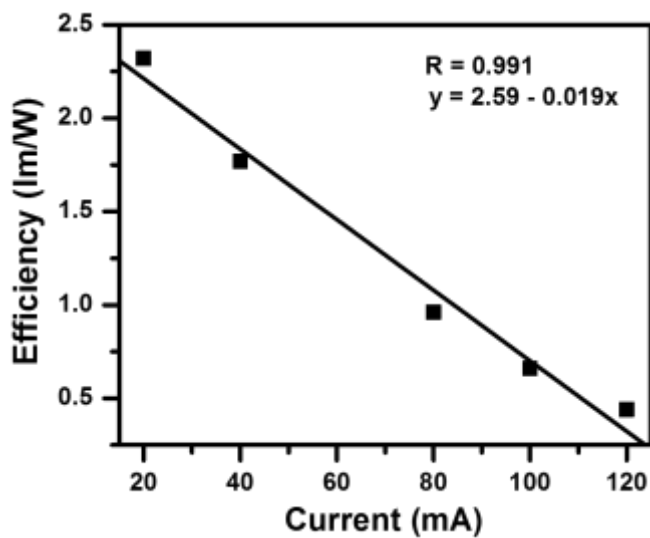

**Figure S8.** Relationship between the working current of all-copper based down conversion WLEDs and their luminous efficiency.

Table S1. Performance comparison of all-copper based down-conversion WLEDs with previously reported WLEDs employing metal nanoclusters

| Reference | CIE(x, y)    | CCT (K) | CRI |
|-----------|--------------|---------|-----|
| 1         | (0.32, 0.36) | /       | /   |
| 2         | (0.31, 0.36) | 6577    | 88  |
| 3         | (0.35, 0.33) | 4742    | 92  |
| This work | (0.36, 0.31) | 4163    | 91  |

## References

1. Z. Wu, J. Liu, Y. Gao, H. Liu, T. Li, H. Zou, Z. Wang, K. Zhang, Y. Wang, H. Zhang and B. Yang, *J. Am. Chem. Soc.*, 2015, **137**, 12906.
2. J. Liu, Z. Wu, T. Li, D. Zhou, K. Zhang, Y. Sheng, J. Cui, H. Zhang and B. Yang, *Nanoscale* 2016, **8**, 395.
3. Z. Wang, A. Susa, B. Chen, C. Reckmeier, O. Tomanec, R. Zboril, H. Zhong, A. Rogach, *Nanoscale* 2016, **8**, 7197.
